# Supplementary material for: Electro-optic evolution driven by static and relaxational nano ferroelectric domains in KTa1−xNbxO3
Source: Royal Society of Chemistry journal article supplement (doi:10.1039/c9tc05580k), 2020-01-01
Supplement: c9tc05580k1.pdf [file c9tc05580k1.pdf]

## Supporting Information

The schematic diagram of Senarmont single-beam compensation method was shown in **Figure 1**. The intensity of the laser after analyzer can be described as follows

$$I' = I_0 \sin^2 \left( \frac{\Delta\Phi + \pi/2}{2} \right) = \frac{I_0}{2} (1 + \sin \Delta\Phi) \quad (1)$$

Where the  $\Delta\Phi$  is small caused by electric-optic effect. The equation 1 was simplified to follow equation (2)

$$I' = \frac{I_0}{2} (1 + \sin \Delta\Phi) = \frac{I_0}{2} (1 + \Delta\Phi) \quad (2)$$

$I = \frac{I_0}{2}$  when the electric field is zero. It was adjusted by analyzer in rotation angle  $\alpha$ . The change of intensity of probing location obey the follow equation (3)

$$\Delta I = I' - I = \frac{I_0}{2} \Delta\Phi \quad (3)$$

The phase difference obeys equation as follows

$$\Delta\Phi = \frac{\Delta I}{I_0/2} = \frac{V_{out}}{V_{p-p}/2} = \frac{2\pi\Delta n \cdot l}{\lambda} \quad (4)$$

Where  $l$  is the length of crystal along the laser direction and  $\Delta n$  is the variation of refractive index. The liner and quadratic effective electro-optic coefficient can be described as follows

$$\gamma_{eff} = \frac{\lambda d}{n^3 V \pi l} \cdot \frac{V_{out}}{V_{p-p}/2} \quad (5)$$

$$s_{11} - s_{12} = \frac{\lambda d^2}{n^3 V^2 \pi l} \cdot \frac{V_{out}}{V_{p-p}/2} \quad (6)$$

Where  $d$  is the length of crystal along the electric field and  $V$  is the voltage on the crystal.  $V_{p-p}/2$  is the voltage signal when the intensity of laser is  $I_0/2$ .  $V_{out}$  is the voltage collection signal.

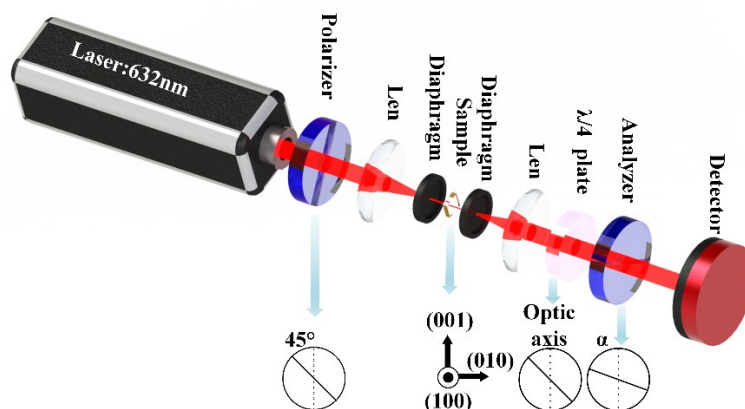

**Figure 1.** The schematic diagram of Senarmont single-beam compensation method
